# Supplementary material
Source: PubMed Central journal article supplement (PMC4231777)
Supplement: NIHMS640205-supplement-S_Data.pdf [file NIHMS640205-supplement-S_Data.pdf]

## Supplementary Data

### Supplementary Fig.1:

- a) Tumors of *Ptch<sup>flox/flox</sup>LysMcre<sup>+/-</sup>* highly expressed *Pdgfra* b) Tumors were negative for Kit as revealed by Western Blot analysis of tumors of *Ptch<sup>flox/flox</sup>LysMcre<sup>+/-</sup>* mice compared to normal small intestine. Human GIST-T1 lysates served as positive control for KIT expression.
- c) Tumors do not express *Pdgfrβ* (see *Pdgfrβ* positive vessels marked by arrow heads).

**a**

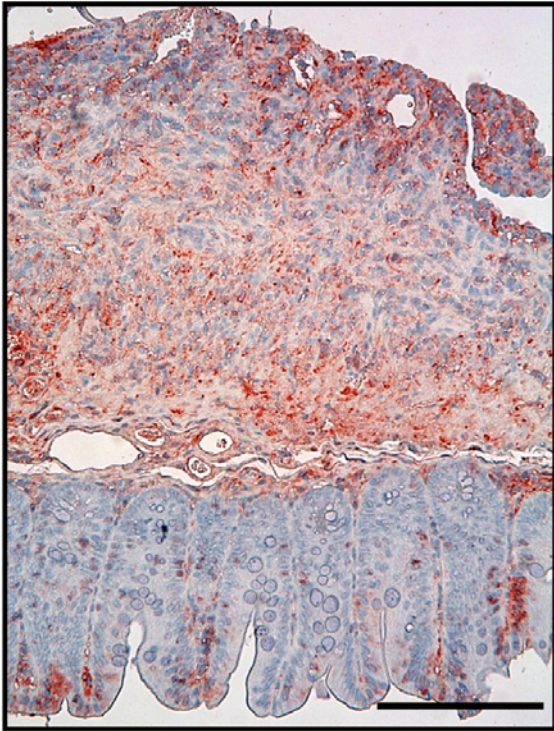

**b**

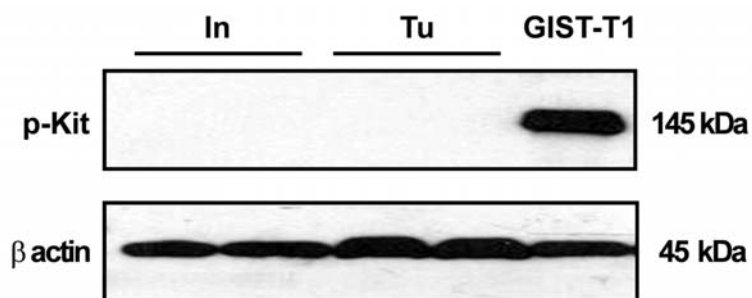

c

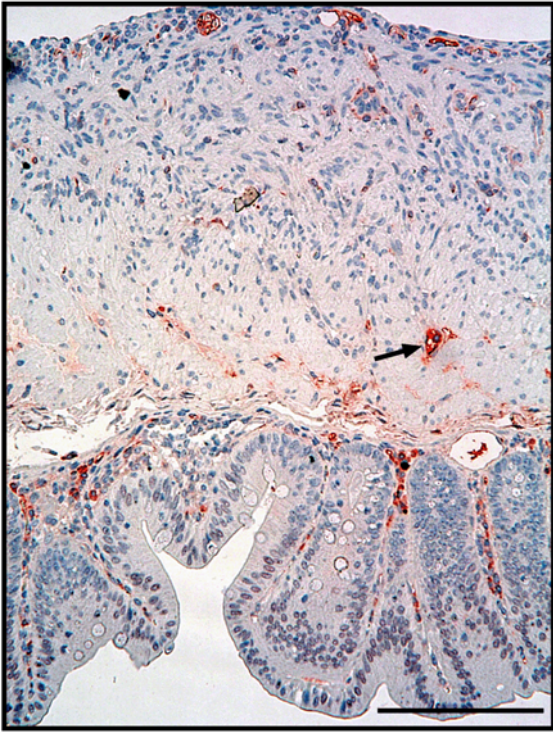

**Supplementary Table 1: Oligonucleotides used for genotyping and RT-PCR**

| <b>Genotyping</b>               |                                            |                                                        |
|---------------------------------|--------------------------------------------|--------------------------------------------------------|
| <i>Primer Name</i>              | <i>Primer Sequence (5'-3' orientation)</i> | <i>Application</i>                                     |
| mLys1                           | CTTGGGCTGCCAGAATTTCTC                      | Genotyping of <i>LysMcre</i> mice                      |
| mLys2                           | TTACAGTCGGCCAGGCTGAC                       |                                                        |
| Cre8                            | CCCAGAAATGCCAGATTACG                       |                                                        |
| Rosa1                           | AAAGTCGCTCTGAGTTGTTAT                      | Genotyping of <i>LacZ</i> and <i>YFP</i> knock-in mice |
| Rosa2                           | GCGAAGAGTTTGTCTCAACC                       |                                                        |
| Rosa3                           | GGAGCGGGAGAAATGGATATG                      |                                                        |
| p910F.4                         | GCGAAGAGTTTGTCTCAACC                       | Genotyping of <i>Ptch<sup>fllox</sup></i> mice         |
| p1011R.2                        | GGAGCGGGAGAAATGGATATG                      |                                                        |
| Neo-F                           | CGTGATATTGCTGAAGAGCTTGG                    |                                                        |
| Neo-R                           | GCATCAGAGCAGCCGATTGTCTG                    |                                                        |
| Exon 7-F                        | AGGAAGTATATGCATTGGCAGGAG                   |                                                        |
| mPTCwt_r.2                      | ACACAACAGGGTGGAGACCAC T                    |                                                        |
| mPTCNx_f                        | TGGTAATTCTGGGCTCCCGT                       |                                                        |
| mPTCNx_r                        | CCGGTAGAATTAGCTTGAAGTTCCT                  |                                                        |
|                                 |                                            |                                                        |
| <b>Semi-Quantitative RT-PCR</b> |                                            |                                                        |
| <i>Primer Name</i>              | <i>Primer Sequence (5'-3' orientation)</i> | <i>Application</i>                                     |
| mCD21F.1                        | CTGTGAGAGTGATTTCCCTCTGGA                   | murine <i>CD21</i> expression analysis                 |
| mCD21R.2                        | GCAAATAGCCAGGTTCACAACTGTA                  |                                                        |
| mCD23F.1                        | ATTTCAAAGGGAAGTGCATGCA                     | murine <i>CD23</i> expression analysis                 |
| mCD23R.1                        | ACTAGTCGCCCTTGCAGGTCA                      |                                                        |
| mCD35F.1                        | TTGTAATCAAGGATACCGCCTCATT                  | murine <i>CD35</i> expression analysis                 |
| mCD35R.1                        | AGAAATCTCCATTGGGAATGCCT                    |                                                        |
| Krt 7 F1                        | GCCTGGAGGTGGAAGTGCAGAAC                    | murine <i>Krt7</i> expression analysis                 |
| Krt 7 F2                        | CAGCTCGAGACACTGCAGCTGGAT                   |                                                        |

### Semi-Quantitative RT-PCR

| <i>Primer Name</i> | <i>Primer Sequence (5'-3' orientation)</i> | <i>Application</i>                      |
|--------------------|--------------------------------------------|-----------------------------------------|
| Gapdh-F            | ATCTTCTTGTGCAGTGCCAG                       | murine <i>Gapdh</i> expression analysis |
| Gapdh-R            | ATGGCATGGACTGTGGTCAT                       |                                         |

### Quantitative RT-PCR

| <i>Primer Name</i> | <i>Primer Sequence (5'-3' orientation)</i> | <i>Application</i>                      |
|--------------------|--------------------------------------------|-----------------------------------------|
| mHand2F.1          | TGGCCAAGGACGACCAGAA                        | murine <i>Hand2</i> expression analysis |
| mHand2R.1          | TTCAAGATCTCATTTCAGCTCTTTCTTC               |                                         |
| mFoxf1F.1          | AACAGCCTCTGTCCCCTTGC                       | murine <i>FoxF1</i> expression analysis |
| mFoxf1R.1          | CGAGGGATGCCTTGCAGTTCT                      |                                         |
| mGli1-tq-F         | TACATGCTGGTGGTGCACATG                      | murine <i>Gli1</i> expression analysis  |
| mGli1-tq-r         | ACCGAAGGTGCGTCTTGAGG                       |                                         |
| mPTC10             | TACAGTCCGGGACAGCATAACC                     | murine <i>Ptch</i> expression analysis  |
| mPTC11R            | GTACCCATGGCCAACTTCGGCTTT                   |                                         |
| mPdgfa F           | GCAAGACCAGGACGGTCATTTAC                    | murine <i>Pdgfa</i> expression analysis |
| mPdgfa R           | GGCTTCTTCCTGACATACTC                       |                                         |
| mPdgfb F           | GGCTGCTGCAATAACCGCAATG                     | murine <i>Pdgfb</i> expression analysis |
| mPdgfb R           | CCTGGATGTCCCAGGACTTCTAG                    |                                         |
| mPdgfc F           | GTACCTAGAGCCAGATCGATGG                     | murine <i>Pdgfc</i> expression analysis |
| mPdgfc R           | CTCTTCCCGTATGGACACTGAG                     |                                         |
| 18S-fwd            | CGCAAATTACCCACTCCCG                        | murine <i>18s</i> expression analysis   |
| 18S-rev2           | TTCCAATTACAGGGCCTCGAA                      |                                         |
| GLI1 F             | CCAGCGCCCAGACAGAG                          | human <i>GLI1</i> expression analysis   |
| GLI1 R             | GGCTCGCCATAGCTACTGAT                       |                                         |
| PTCH F             | TGGGATTA AAAAGCAGCGAAC                     | human <i>PTCH</i> expression analysis   |
| PTCH R             | TCTCCAATCTTCTGGCGAGT                       |                                         |
| HAND2 F            | CCTTTGAGGCATCTGCTCC                        | human <i>HAND2</i> expression           |

---

## Quantitative RT-PCR

---

| <i>Primer Name</i> | <i>Primer Sequence (5'-3' orientation)</i> | <i>Application</i>                     |
|--------------------|--------------------------------------------|----------------------------------------|
| HAND2 R            | GCACACGGGAGTGTCTC                          |                                        |
| FOXF1 F            | CGTATCTGCACCAGAACAGC                       | human <i>FOXF1</i> expression analysis |
| FOXF1 R            | GACAAACTCCTTTCGGTCACA                      |                                        |

---

**Supplementary Table 2: Primary and secondary antibodies for immunohistochemistry and Western Blot**

| <b>primary antibodies for IHC</b>                                                  | <b>dilution</b> | <b>antigen retrieval</b>        |
|------------------------------------------------------------------------------------|-----------------|---------------------------------|
| pAb rabbit anti-Pdgfr $\alpha$ (C-20)<br>Santa Cruz Biotechnologies, SC 338        | 1:1000          | boric acid pH 5.2; 30 min, 60°C |
| mAb rabbit anti- Pdgfr $\beta$ (C82A3)<br>Cell Signaling 4564                      | 1:1000          | citric acid pH 6; heat mediated |
| <b>secondary antibodies for IHC</b>                                                | <b>dilution</b> |                                 |
| En vision+ anti- rabbit/mouse/HRP*<br>Dako K5007                                   | undiluted       |                                 |
| <b>primary antibodies for immunofluorescence</b>                                   | <b>dilution</b> |                                 |
| mAb rat anti- cKit<br>Cedarlane CL8936AP                                           | 1:200           |                                 |
| mAb rat anti- PDGFR $\alpha$<br>Cell signaling 3174                                | 1:100           |                                 |
| pAb goat anti- GFP<br>Rockland 600-101-215                                         | 1:400           |                                 |
| <b>secondary antibodies for immunofluorescence</b>                                 | <b>dilution</b> |                                 |
| Rhodamin red conj. anti- rat<br>Jackson Laboratories 712-295-153                   | 1:200           |                                 |
| 488 (green) anti- rat<br>Invitrogen A-21208                                        | 1:1000          |                                 |
| 488 (green) anti- rabbit<br>Invitrogen A-21206                                     | 1:1000          |                                 |
| 568 (red) anti- goat<br>Invitrogen A-11057                                         | 1:1000          |                                 |
| <b>primary antibodies for Western Blot</b>                                         | <b>dilution</b> |                                 |
| pAb rabbit anti- p-cKit (Tyr 719)<br>Cell Signaling, 3319                          | 1:1000          |                                 |
| pAb rabbit anti- p-Pdgfr $\alpha$ (Tyr 754)<br>Santa Cruz Biotechnologies, SC12911 | 1:500           |                                 |
| pAb rabbit anti- Pdgfr $\alpha$ (C-20)<br>Santa Cruz Biotechnologies, SC 338       | 1:500           |                                 |
| mAb mouse anti- $\beta$ actin (C4)<br>Santa Cruz Biotechnologies, SC 47778         | 1:5000          |                                 |
| mAb rabbit anti- Actin<br>Cell signaling 4970S                                     | 1:5000          |                                 |
| <b>secondary antibodies for Western Blot</b>                                       | <b>dilution</b> |                                 |
| pAb mouse anti- rabbit/HRP**<br>Sigma AO545                                        | 1:5000          |                                 |
| pAb sheep anti- mouse/HRP**<br>Amersham NA931                                      | 1:10000         |                                 |

\* antibody binding was visualized using DAB+ (En vision+ system-HRP, Dako) or aminoethylcarbazol as chromogen.

\*\* signals were visualized using the ECL plus detection system (GE Healthcare).

abbreviations: HRP, horseradish peroxidase; IHC, immunohistochemistry; mAb, monoclonal antibody; pAb, polyclonal antibody

**Supplementary Material and Methods: *In situ* hybridization, Western blot, immunofluorescence, immunoperoxidase and LacZ staining**

*In situ* hybridization was performed as described <sup>1</sup>. The probe sequences for mouse *Gli1* are reported in <sup>2</sup>. The *Ptch* specific probes were a 477 bp fragment spanning exons 2 to 6, and a 250 bp fragment spanning exons 8 and 9 of the *Ptch* gene <sup>3</sup>.

LacZ activity was analyzed according to the standard procedures. In short, intestines were fixed for 2h in 4% paraformaldehyde in phosphate buffered saline. Fixed tissues were washed in PBS and soaked in 25% sucrose in PBS overnight. Tissues were frozen in OCT and chilled on dry ice. Sections were cut at 7 µm thickness. Dried tissue sections were post fixed with 0.2% glutaraldehyde in PBS and washed three times in rinse solution (0.005% Nonidet P-40 and 0.01% sodium deoxycholate in PBS). Slides were stained overnight at 30°C in standard staining solution (5 mM potassium ferricyanide, 5 mM potassium ferrocyanide, 2 mM MgCl<sub>2</sub>, 0.4% X-gal in DMSO). Slides were then washed with PBS and mounted.

For Western blot analysis the organs were collected, washed thoroughly with PBS and lysed in RIPA buffer. Fifty µg of total cell lysates were loaded on a denaturing SDS gel. The membranes were blocked with 0.2% casein for 1 hour and probed with the primary antibodies at 4°C overnight. HRP-conjugated secondary antibodies and ECL plus Reagent (Amersham Pharmacia Biotech, GE Healthcare Life Sciences, UK) were used to visualize the signals.

For immunofluorescence analysis tissues were fixed in cold 4% paraformaldehyde in PBS overnight at 4 °C and then incubated in 30% sucrose for 48h at 4 °C. Tissues were frozen in Tissue Tec. After sectioning, slides were stained with antibodies and mounted with *Slowfade* Gold anti-fade reagent containing DAPI (Invitrogen, S36938).

For immunoperoxidase staining and *in situ* hybridization, formalin-fixed tissue samples were embedded in paraffin and sectioned.

All primary and secondary antibodies, the respective dilutions, and if necessary the respective antigen retrieval methods are described in Supplementary Table 2.

### **Supplementary Literature**

1. van Dop, W.A. et al. Depletion of the colonic epithelial precursor cell compartment upon conditional activation of the hedgehog pathway. *Gastroenterology* **136**, 2195-2203 e1-7 (2009).
2. Wijgerde, M., Ooms, M., Hoogerbrugge, J.W. & Grootegoed, J.A. Hedgehog signaling in mouse ovary: Indian hedgehog and desert hedgehog from granulosa cells induce target gene expression in developing theca cells. *Endocrinology* **146**, 3558-66 (2005).
3. Zibat, A. et al. Time-point and dosage of gene inactivation determine the tumor spectrum in conditional Ptch knockouts. *Carcinogenesis* **30**, 918-26 (2009).
